# Supplementary material
Source: MDPI journal article supplement (https://www.mdpi.com/2413-8851/5/4/72)
Supplement: s1 [file s1]

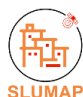

Summary Results of Online Survey – Conducted 2020-21 by SLUMAP

| Summary for G6Q00001(SQ01)[Vagueness in definition of terms (e.g. slum, deprivation, informal settlements)]      |       |                  |  |
|------------------------------------------------------------------------------------------------------------------|-------|------------------|--|
| Please rank the following problems you encountered in your work or research from the most frequent to the least. |       |                  |  |
| Answer                                                                                                           | Count | Gross percentage |  |
| 5 - Most frequently encountered (AO09)                                                                           | 38    | 33.93%           |  |
| 4 (AO08)                                                                                                         | 21    | 18.75%           |  |
| 3 (AO10)                                                                                                         | 11    | 9.82%            |  |
| 2 (AO11)                                                                                                         | 12    | 10.71%           |  |
| 1 - Least frequently encountered (AO12)                                                                          | 12    | 10.71%           |  |
| No answer                                                                                                        | 18    | 16.07%           |  |
| Not displayed                                                                                                    | 0     | 0.00%            |  |
| Total(gross)                                                                                                     | 112   | 100.00%          |  |
| Summary for G6Q00001(SQ02)[Confusing terms used]                                                                 |       |                  |  |
| Please rank the following problems you encountered in your work or research from the most frequent to the least. |       |                  |  |
| Answer                                                                                                           | Count | Gross percentage |  |
| 5 - Most frequently encountered (AO09)                                                                           | 14    | 12.50%           |  |
| 4 (AO08)                                                                                                         | 23    | 20.54%           |  |
| 3 (AO10)                                                                                                         | 22    | 19.64%           |  |
| 2 (AO11)                                                                                                         | 14    | 12.50%           |  |
| 1 - Least frequently encountered (AO12)                                                                          | 16    | 14.29%           |  |
| No answer                                                                                                        | 23    | 20.54%           |  |
| Not displayed                                                                                                    | 0     | 0.00%            |  |
| Total(gross)                                                                                                     | 112   | 100.00%          |  |
| Summary for G6Q00001(SQ03)[Large data uncertainty (e.g. uncertainties in measurement and visual interpretation)] |       |                  |  |
| Please rank the following problems you encountered in your work or research from the most frequent to the least. |       |                  |  |
| Answer                                                                                                           | Count | Gross percentage |  |
| 5 - Most frequently encountered (AO09)                                                                           | 38    | 33.93%           |  |
| 4 (AO08)                                                                                                         | 24    | 21.43%           |  |
| 3 (AO10)                                                                                                         | 16    | 14.29%           |  |
| 2 (AO11)                                                                                                         | 8     | 7.14%            |  |
| 1 - Least frequently encountered                                                                                 | 4     | 3.57%            |  |
| No answer                                                                                                        | 22    | 19.64%           |  |
| Not displayed                                                                                                    | 0     | 0.00%            |  |
| Total(gross)                                                                                                     | 112   | 100.00%          |  |
| Summary for G6Q00001(SQ04)[Low data accuracy]                                                                    |       |                  |  |
| Please rank the following problems you encountered in your work or research from the most frequent to the least. |       |                  |  |
| Answer                                                                                                           | Count | Gross percentage |  |
| 5 - Most frequently encountered (AO09)                                                                           | 36    | 32.14%           |  |
| 4 (AO08)                                                                                                         | 26    | 23.21%           |  |
| 3 (AO10)                                                                                                         | 19    | 16.96%           |  |
| 2 (AO11)                                                                                                         | 8     | 7.14%            |  |
| 1 - Least frequently encountered (AO12)                                                                          | 6     | 5.36%            |  |
| No answer                                                                                                        | 17    | 15.18%           |  |
| Not displayed                                                                                                    | 0     | 0.00%            |  |
| Total(gross)                                                                                                     | 112   | 100.00%          |  |
| Summary for G6Q00001(SQ05)[Limited data compatibility/interoperability]                                          |       |                  |  |
| Please rank the following problems you encountered in your work or research from the most frequent to the least. |       |                  |  |
| Answer                                                                                                           | Count | Gross percentage |  |
| 5 - Most frequently encountered (AO09)                                                                           | 23    | 20.54%           |  |
| 4 (AO08)                                                                                                         | 28    | 25.00%           |  |
| 3 (AO10)                                                                                                         | 11    | 9.82%            |  |
| 2 (AO11)                                                                                                         | 8     | 7.14%            |  |
| 1 - Least frequently encountered (AO12)                                                                          | 9     | 8.04%            |  |
| No answer                                                                                                        | 33    | 29.46%           |  |
| Not displayed                                                                                                    | 0     | 0.00%            |  |
| Total(gross)                                                                                                     | 112   | 100.00%          |  |
| Summary for G6Q00001(SQ06)[Limited data accessibility]                                                           |       |                  |  |
| Please rank the following problems you encountered in your work or research from the most frequent to the least. |       |                  |  |
| Answer                                                                                                           | Count | Gross percentage |  |
| 5 - Most frequently encountered (AO09)                                                                           | 39    | 34.82%           |  |
| 4 (AO08)                                                                                                         | 35    | 31.25%           |  |
| 3 (AO10)                                                                                                         | 13    | 11.61%           |  |
| 2 (AO11)                                                                                                         | 3     | 2.68%            |  |
| 1 - Least frequently encountered (AO12)                                                                          | 5     | 4.46%            |  |
| No answer                                                                                                        | 17    | 15.18%           |  |
| Not displayed                                                                                                    | 0     | 0.00%            |  |
| Total(gross)                                                                                                     | 112   | 100.00%          |  |



## Results of Online Survey: <https://slummap.net/>

| Summary for G6Q0001(SQ07)[Limited spatial/temporal coverage]                                                     |       |                  |  |
|------------------------------------------------------------------------------------------------------------------|-------|------------------|--|
| Please rank the following problems you encountered in your work or research from the most frequent to the least. |       |                  |  |
| Answer                                                                                                           | Count | Gross percentage |  |
| 5 - Most frequently encountered (AO09)                                                                           | 35    | 31.25%           |  |
| 4 (AO08)                                                                                                         | 30    | 26.79%           |  |
| 3 (AO10)                                                                                                         | 21    | 18.75%           |  |
| 2 (AO11)                                                                                                         | 3     | 2.68%            |  |
| 1 - Least frequently encountered (AO12)                                                                          | 3     | 2.68%            |  |
| No answer                                                                                                        | 20    | 17.86%           |  |
| Not displayed                                                                                                    | 0     | 0.00%            |  |
| Total(gross)                                                                                                     | 112   | 100.00%          |  |
| Summary for G6Q0001(SQ08)[Limited spatial/temporal resolution]                                                   |       |                  |  |
| Please rank the following problems you encountered in your work or research from the most frequent to the least. |       |                  |  |
| Answer                                                                                                           | Count | Gross percentage |  |
| 5 - Most frequently encountered (AO09)                                                                           | 35    | 31.25%           |  |
| 4 (AO08)                                                                                                         | 24    | 21.43%           |  |
| 3 (AO10)                                                                                                         | 19    | 16.96%           |  |
| 2 (AO11)                                                                                                         | 6     | 5.36%            |  |
| 1 - Least frequently encountered (AO12)                                                                          | 3     | 2.68%            |  |
| No answer                                                                                                        | 25    | 22.32%           |  |
| Not displayed                                                                                                    | 0     | 0.00%            |  |
| Total(gross)                                                                                                     | 112   | 100.00%          |  |
| Summary for G6Q0001(SQ09)[Lack of up-to-date data]                                                               |       |                  |  |
| Please rank the following problems you encountered in your work or research from the most frequent to the least. |       |                  |  |
| Answer                                                                                                           | Count | Gross percentage |  |
| 5 - Most frequently encountered (AO09)                                                                           | 65    | 58.04%           |  |
| 4 (AO08)                                                                                                         | 18    | 16.07%           |  |
| 3 (AO10)                                                                                                         | 10    | 8.93%            |  |
| 2 (AO11)                                                                                                         | 3     | 2.68%            |  |
| 1 - Least frequently encountered (AO12)                                                                          | 0     | 0.00%            |  |
| No answer                                                                                                        | 16    | 14.29%           |  |
| Not displayed                                                                                                    | 0     | 0.00%            |  |
| Total(gross)                                                                                                     | 112   | 100.00%          |  |
| Summary for G6Q0002(SQ01)[Communication]                                                                         |       |                  |  |
| Which of the following you've found to be most difficult in your work or research related to slum data?          |       |                  |  |
| Answer                                                                                                           | Count | Gross percentage |  |
| 5 - Very difficult (AO01)                                                                                        | 20    | 17.86%           |  |
| 4 (AO02)                                                                                                         | 25    | 22.32%           |  |
| 3 (AO03)                                                                                                         | 20    | 17.86%           |  |
| 2 (AO04)                                                                                                         | 20    | 17.86%           |  |
| 1 - Not difficult at all (AO05)                                                                                  | 12    | 10.71%           |  |
| No answer                                                                                                        | 15    | 13.39%           |  |
| Not displayed                                                                                                    | 0     | 0.00%            |  |
| Total(gross)                                                                                                     | 112   | 100.00%          |  |
| Summary for G6Q0002(SQ02)[Information and knowledge sharing]                                                     |       |                  |  |
| Which of the following you've found to be most difficult in your work or research related to slum data?          |       |                  |  |
| Answer                                                                                                           | Count | Gross percentage |  |
| 5 - Very difficult (AO01)                                                                                        | 28    | 25.00%           |  |
| 4 (AO02)                                                                                                         | 25    | 22.32%           |  |
| 3 (AO03)                                                                                                         | 26    | 23.21%           |  |
| 2 (AO04)                                                                                                         | 8     | 7.14%            |  |
| 1 - Not difficult at all (AO05)                                                                                  | 9     | 8.04%            |  |
| No answer                                                                                                        | 16    | 14.29%           |  |
| Not displayed                                                                                                    | 0     | 0.00%            |  |
| Total(gross)                                                                                                     | 112   | 100.00%          |  |
| Summary for G6Q0002(SQ03)[Data analysis]                                                                         |       |                  |  |
| Which of the following you've found to be most difficult in your work or research related to slum data?          |       |                  |  |
| Answer                                                                                                           | Count | Gross percentage |  |
| 5 - Very difficult (AO01)                                                                                        | 10    | 8.93%            |  |
| 4 (AO02)                                                                                                         | 26    | 23.21%           |  |
| 3 (AO03)                                                                                                         | 35    | 31.25%           |  |
| 2 (AO04)                                                                                                         | 13    | 11.61%           |  |
| 1 - Not difficult at all (AO05)                                                                                  | 13    | 11.61%           |  |
| No answer                                                                                                        | 15    | 13.39%           |  |
| Not displayed                                                                                                    | 0     | 0.00%            |  |
| Total(gross)                                                                                                     | 112   | 100.00%          |  |
| Summary for G6Q0002(SQ04)[Data synthesis (combination and organization)]                                         |       |                  |  |
| Which of the following you've found to be most difficult in your work or research related to slum data?          |       |                  |  |
| Answer                                                                                                           | Count | Gross percentage |  |
| 5 - Very difficult (AO01)                                                                                        | 16    | 14.29%           |  |
| 4 (AO02)                                                                                                         | 22    | 19.64%           |  |
| 3 (AO03)                                                                                                         | 34    | 30.36%           |  |
| 2 (AO04)                                                                                                         | 18    | 16.07%           |  |



## Results of Online Survey: <https://slummap.net/>

|                                                                                                                                                        |       |                  |
|--------------------------------------------------------------------------------------------------------------------------------------------------------|-------|------------------|
| 1 - Not difficult at all (AO05)                                                                                                                        | 5     | 4.46%            |
| No answer                                                                                                                                              | 17    | 15.18%           |
| Not displayed                                                                                                                                          | 0     | 0.00%            |
| Total(gross)                                                                                                                                           | 112   | 100.00%          |
| <b>Summary for G6Q00003</b>                                                                                                                            |       |                  |
| Please choose the slum characteristics (at most 3 choices) that you would need the most in your work or research.                                      |       |                  |
| Answer                                                                                                                                                 | Count | Gross percentage |
| Slum location (SQ01)                                                                                                                                   | 62    | 55.36%           |
| Slum size (SQ02)                                                                                                                                       | 52    | 46.43%           |
| Slum shape (SQ03)                                                                                                                                      | 24    | 21.43%           |
| Surrounding environment (SQ04)                                                                                                                         | 31    | 27.68%           |
| Slum building type (SQ05)                                                                                                                              | 36    | 32.14%           |
| Slum building density/spacing (SQ06)                                                                                                                   | 60    | 53.57%           |
| Slum roof materials (SQ07)                                                                                                                             | 11    | 9.82%            |
| Other                                                                                                                                                  | 9     | 8.04%            |
| Total(gross)                                                                                                                                           | 285   | 100.00%          |
| <b>Summary for G6Q00004(SQ01)[There may be a universal definition of slums.]</b>                                                                       |       |                  |
| According to your knowledge, do you think different users would be able to agree upon the following statements for a global spatial database on slums? |       |                  |
| Answer                                                                                                                                                 | Count | Gross percentage |
| Yes (Y)                                                                                                                                                | 30    | 26.79%           |
| No (N)                                                                                                                                                 | 28    | 25.00%           |
| Uncertain (U)                                                                                                                                          | 42    | 37.50%           |
| No answer                                                                                                                                              | 12    | 10.71%           |
| Not displayed                                                                                                                                          | 0     | 0.00%            |
| Total(gross)                                                                                                                                           | 112   | 100.00%          |
| <b>Summary for G6Q00004(SQ02)[A slum can be delineated by clear boundary.]</b>                                                                         |       |                  |
| According to your knowledge, do you think different users would be able to agree upon the following statements for a global spatial database on slums? |       |                  |
| Answer                                                                                                                                                 | Count | Gross percentage |
| Yes (Y)                                                                                                                                                | 28    | 25.00%           |
| No (N)                                                                                                                                                 | 33    | 29.46%           |
| Uncertain (U)                                                                                                                                          | 40    | 35.71%           |
| No answer                                                                                                                                              | 11    | 9.82%            |
| Not displayed                                                                                                                                          | 0     | 0.00%            |
| Total(gross)                                                                                                                                           | 112   | 100.00%          |
| <b>Summary for G6Q00004(SQ03)[A slum has an exact location.]</b>                                                                                       |       |                  |
| According to your knowledge, do you think different users would be able to agree upon the following statements for a global spatial database on slums? |       |                  |
| Answer                                                                                                                                                 | Count | Gross percentage |
| Yes (Y)                                                                                                                                                | 46    | 41.07%           |
| No (N)                                                                                                                                                 | 17    | 15.18%           |
| Uncertain (U)                                                                                                                                          | 37    | 33.04%           |
| No answer                                                                                                                                              | 12    | 10.71%           |
| Not displayed                                                                                                                                          | 0     | 0.00%            |
| Total(gross)                                                                                                                                           | 112   | 100.00%          |
| <b>Summary for G6Q00005(SQ01)[Sharing exact boundaries]</b>                                                                                            |       |                  |
| How sensitive is it to share spatial data on slums, with regards to privacy issues?                                                                    |       |                  |
| Answer                                                                                                                                                 | Count | Gross percentage |
| 5 - Very sensitive (AO01)                                                                                                                              | 22    | 19.64%           |
| 4 (AO02)                                                                                                                                               | 21    | 18.75%           |
| 3 (AO03)                                                                                                                                               | 16    | 14.29%           |
| 2 (AO04)                                                                                                                                               | 19    | 16.96%           |
| 1 - Non-sensitive (AO05)                                                                                                                               | 19    | 16.96%           |
| No answer                                                                                                                                              | 15    | 13.39%           |
| Not displayed                                                                                                                                          | 0     | 0.00%            |
| Total(gross)                                                                                                                                           | 112   | 100.00%          |
| <b>Summary for G6Q00005(SQ02)[Sharing central/centroid location]</b>                                                                                   |       |                  |
| How sensitive is it to share spatial data on slums, with regards to privacy issues?                                                                    |       |                  |
| Answer                                                                                                                                                 | Count | Gross percentage |
| 5 - Very sensitive (AO01)                                                                                                                              | 7     | 6.25%            |
| 4 (AO02)                                                                                                                                               | 14    | 12.50%           |
| 3 (AO03)                                                                                                                                               | 18    | 16.07%           |
| 2 (AO04)                                                                                                                                               | 17    | 15.18%           |
| 1 - Non-sensitive (AO05)                                                                                                                               | 35    | 31.25%           |
| No answer                                                                                                                                              | 21    | 18.75%           |
| Not displayed                                                                                                                                          | 0     | 0.00%            |
| Total(gross)                                                                                                                                           | 112   | 100.00%          |
| <b>Summary for G6Q00005(SQ03)[Sharing fuzzy boundaries/gridded probability of slum]</b>                                                                |       |                  |
| How sensitive is it to share spatial data on slums, with regards to privacy issues?                                                                    |       |                  |
| Answer                                                                                                                                                 | Count | Gross percentage |
| 5 - Very sensitive (AO01)                                                                                                                              | 5     | 4.46%            |
| 4 (AO02)                                                                                                                                               | 16    | 14.29%           |



## Results of Online Survey: <https://slummap.net/>

|                                                                                                              |                                |       |                  |         |
|--------------------------------------------------------------------------------------------------------------|--------------------------------|-------|------------------|---------|
|                                                                                                              | 3 (AO03)                       | 17    | 15.18%           |         |
|                                                                                                              | 2 (AO04)                       | 21    | 18.75%           |         |
|                                                                                                              | 1 - Non-sensitive (AO05)       | 31    | 27.68%           |         |
|                                                                                                              | No answer                      | 22    | 19.64%           |         |
|                                                                                                              | Not displayed                  | 0     | 0.00%            |         |
|                                                                                                              | Total(gross)                   | 112   |                  | 100.00% |
| <b>Summary for G6Q00005(SQ04)[Sharing symbols of location such as squares and circles]</b>                   |                                |       |                  |         |
| <b>How sensitive is it to share spatial data on slums, with regards to privacy issues?</b>                   |                                |       |                  |         |
| Answer                                                                                                       |                                | Count | Gross percentage |         |
|                                                                                                              | 5 - Very sensitive (AO01)      | 9     | 8.04%            |         |
|                                                                                                              | 4 (AO02)                       | 14    | 12.50%           |         |
|                                                                                                              | 3 (AO03)                       | 11    | 9.82%            |         |
|                                                                                                              | 2 (AO04)                       | 22    | 19.64%           |         |
|                                                                                                              | 1 - Non-sensitive (AO05)       | 31    | 27.68%           |         |
|                                                                                                              | No answer                      | 25    | 22.32%           |         |
|                                                                                                              | Not displayed                  | 0     | 0.00%            |         |
|                                                                                                              | Total(gross)                   | 112   |                  | 100.00% |
| <b>Summary for G6Q00006(SQ01)[Exact boundary]</b>                                                            |                                |       |                  |         |
| <b>How would you rank the potential of the following representation of slums in protecting data privacy?</b> |                                |       |                  |         |
| Answer                                                                                                       |                                | Count | Gross percentage |         |
|                                                                                                              | 5 - Very high potential (AO01) | 23    | 20.54%           |         |
|                                                                                                              | 4 (AO02)                       | 6     | 5.36%            |         |
|                                                                                                              | 3 (AO03)                       | 14    | 12.50%           |         |
|                                                                                                              | 2 (AO04)                       | 23    | 20.54%           |         |
|                                                                                                              | 1 - No potential (AO05)        | 19    | 16.96%           |         |
|                                                                                                              | No answer                      | 27    | 24.11%           |         |
|                                                                                                              | Not displayed                  | 0     | 0.00%            |         |
|                                                                                                              | Total(gross)                   | 112   |                  | 100.00% |
| <b>Summary for G6Q00006(SQ03)[Fuzzy boundary]</b>                                                            |                                |       |                  |         |
| <b>How would you rank the potential of the following representation of slums in protecting data privacy?</b> |                                |       |                  |         |
| Answer                                                                                                       |                                | Count | Gross percentage |         |
|                                                                                                              | 5 - Very high potential (AO01) | 13    | 11.61%           |         |
|                                                                                                              | 4 (AO02)                       | 22    | 19.64%           |         |
|                                                                                                              | 3 (AO03)                       | 19    | 16.96%           |         |
|                                                                                                              | 2 (AO04)                       | 15    | 13.39%           |         |
|                                                                                                              | 1 - No potential (AO05)        | 12    | 10.71%           |         |
|                                                                                                              | No answer                      | 31    | 27.68%           |         |
|                                                                                                              | Not displayed                  | 0     | 0.00%            |         |
|                                                                                                              | Total(gross)                   | 112   |                  | 100.00% |
| <b>Summary for G6Q00006(SQ04)[Gridded slum probability]</b>                                                  |                                |       |                  |         |
| <b>How would you rank the potential of the following representation of slums in protecting data privacy?</b> |                                |       |                  |         |
| Answer                                                                                                       |                                | Count | Gross percentage |         |
|                                                                                                              | 5 - Very high potential (AO01) | 22    | 19.64%           |         |
|                                                                                                              | 4 (AO02)                       | 20    | 17.86%           |         |
|                                                                                                              | 3 (AO03)                       | 30    | 26.79%           |         |
|                                                                                                              | 2 (AO04)                       | 4     | 3.57%            |         |
|                                                                                                              | 1 - No potential (AO05)        | 8     | 7.14%            |         |
|                                                                                                              | No answer                      | 28    | 25.00%           |         |
|                                                                                                              | Not displayed                  | 0     | 0.00%            |         |
|                                                                                                              | Total(gross)                   | 112   |                  | 100.00% |
| <b>Summary for G6Q00006(SQ05)[Only rough symbol over the slum location]</b>                                  |                                |       |                  |         |
| <b>How would you rank the potential of the following representation of slums in protecting data privacy?</b> |                                |       |                  |         |
| Answer                                                                                                       |                                | Count | Gross percentage |         |
|                                                                                                              | 5 - Very high potential (AO01) | 16    | 14.29%           |         |
|                                                                                                              | 4 (AO02)                       | 20    | 17.86%           |         |
|                                                                                                              | 3 (AO03)                       | 15    | 13.39%           |         |
|                                                                                                              | 2 (AO04)                       | 14    | 12.50%           |         |
|                                                                                                              | 1 - No potential (AO05)        | 13    | 11.61%           |         |
|                                                                                                              | No answer                      | 34    | 30.36%           |         |
|                                                                                                              | Not displayed                  | 0     | 0.00%            |         |
|                                                                                                              | Total(gross)                   | 112   |                  | 100.00% |
| <b>Summary for G6Q00006(SQ06)[Only central/centroid location]</b>                                            |                                |       |                  |         |
| <b>How would you rank the potential of the following representation of slums in protecting data privacy?</b> |                                |       |                  |         |
| Answer                                                                                                       |                                | Count | Gross percentage |         |
|                                                                                                              | 5 - Very high potential (AO01) | 22    | 19.64%           |         |
|                                                                                                              | 4 (AO02)                       | 13    | 11.61%           |         |
|                                                                                                              | 3 (AO03)                       | 14    | 12.50%           |         |
|                                                                                                              | 2 (AO04)                       | 11    | 9.82%            |         |
|                                                                                                              | 1 - No potential (AO05)        | 17    | 15.18%           |         |
|                                                                                                              | No answer                      | 35    | 31.25%           |         |
|                                                                                                              | Not displayed                  | 0     | 0.00%            |         |
|                                                                                                              | Total(gross)                   | 112   |                  | 100.00% |



## Results of Online Survey: <https://slummap.net/>

| Summary for G6Q00007(SQ01)[Exact boundary]                                                                               |       |                  |                         |
|--------------------------------------------------------------------------------------------------------------------------|-------|------------------|-------------------------|
| For your work and research, how acceptable is it to represent slums in terms of the following alternatives? Please rank. |       |                  |                         |
| Answer                                                                                                                   | Count | Gross percentage |                         |
| 5- Very much acceptable (AO01)                                                                                           | 56    | 50.00%           |                         |
| 4 (AO02)                                                                                                                 | 19    | 16.96%           |                         |
| 3 (AO03)                                                                                                                 | 9     | 8.04%            |                         |
| 2 (AO04)                                                                                                                 | 4     | 3.57%            |                         |
| 1 - Not acceptable at all (AO05)                                                                                         | 3     | 2.68%            |                         |
| No answer                                                                                                                | 21    | 18.75%           |                         |
| Not displayed                                                                                                            | 0     | 0.00%            |                         |
| Total(gross)                                                                                                             | 112   | 100.00%          |                         |
| Summary for G6Q00007(SQ03)[Gridded slum Probability]                                                                     |       |                  |                         |
| For your work and research, how acceptable is it to represent slums in terms of the following alternatives? Please rank. |       |                  |                         |
| Answer                                                                                                                   | Count | Gross percentage |                         |
| 5- Very much acceptable (AO01)                                                                                           | 18    | 16.07%           |                         |
| 4 (AO02)                                                                                                                 | 25    | 22.32%           |                         |
| 3 (AO03)                                                                                                                 | 18    | 16.07%           |                         |
| 2 (AO04)                                                                                                                 | 10    | 8.93%            |                         |
| 1 - Not acceptable at all (AO05)                                                                                         | 9     | 8.04%            |                         |
| No answer                                                                                                                | 32    | 28.57%           |                         |
| Not displayed                                                                                                            | 0     | 0.00%            |                         |
| Total(gross)                                                                                                             | 112   | 100.00%          |                         |
| Summary for G6Q00007(SQ04)[Fuzzy boundary]                                                                               |       |                  |                         |
| For your work and research, how acceptable is it to represent slums in terms of the following alternatives? Please rank. |       |                  |                         |
| Answer                                                                                                                   | Count | Gross percentage |                         |
| 5- Very much acceptable (AO01)                                                                                           | 15    | 13.39%           |                         |
| 4 (AO02)                                                                                                                 | 30    | 26.79%           |                         |
| 3 (AO03)                                                                                                                 | 14    | 12.50%           |                         |
| 2 (AO04)                                                                                                                 | 14    | 12.50%           |                         |
| 1 - Not acceptable at all (AO05)                                                                                         | 10    | 8.93%            |                         |
| No answer                                                                                                                | 29    | 25.89%           |                         |
| Not displayed                                                                                                            | 0     | 0.00%            |                         |
| Total(gross)                                                                                                             | 112   | 100.00%          |                         |
| Summary for G6Q00007(SQ05)[Only rough symbol over the slum location]                                                     |       |                  |                         |
| For your work and research, how acceptable is it to represent slums in terms of the following alternatives? Please rank. |       |                  |                         |
| Answer                                                                                                                   | Count | Gross percentage |                         |
| 5- Very much acceptable (AO01)                                                                                           | 11    | 9.82%            |                         |
| 4 (AO02)                                                                                                                 | 11    | 9.82%            |                         |
| 3 (AO03)                                                                                                                 | 22    | 19.64%           |                         |
| 2 (AO04)                                                                                                                 | 18    | 16.07%           |                         |
| 1 - Not acceptable at all (AO05)                                                                                         | 17    | 15.18%           |                         |
| No answer                                                                                                                | 33    | 29.46%           |                         |
| Not displayed                                                                                                            | 0     | 0.00%            |                         |
| Total(gross)                                                                                                             | 112   | 100.00%          |                         |
| Summary for G6Q00007(SQ06)[Only central/centroid location]                                                               |       |                  |                         |
| For your work and research, how acceptable is it to represent slums in terms of the following alternatives? Please rank. |       |                  |                         |
| Answer                                                                                                                   | Count | Gross percentage |                         |
| 5- Very much acceptable (AO01)                                                                                           | 9     | 8.04%            |                         |
| 4 (AO02)                                                                                                                 | 7     | 6.25%            |                         |
| 3 (AO03)                                                                                                                 | 16    | 14.29%           |                         |
| 2 (AO04)                                                                                                                 | 18    | 16.07%           |                         |
| 1 - Not acceptable at all (AO05)                                                                                         | 26    | 23.21%           |                         |
| No answer                                                                                                                | 36    | 32.14%           |                         |
| Not displayed                                                                                                            | 0     | 0.00%            |                         |
| Total(gross)                                                                                                             | 112   | 100.00%          |                         |
| Summary for G4Q00001                                                                                                     |       |                  |                         |
| How often do you use spatial data in your current work on the scale of [1 (never), 5 (as often as daily)]?               |       |                  |                         |
| Answer                                                                                                                   | Count | Gross percentage | Top 2, Middle, Bottom 2 |
| 1 (1)                                                                                                                    | 3     | 2.68%            | 14.42%                  |
| 2 (2)                                                                                                                    | 12    | 10.71%           |                         |
| 3 (3)                                                                                                                    | 21    | 18.75%           | 20.19%                  |
| 4 (4)                                                                                                                    | 23    | 20.54%           |                         |
| 5 (5)                                                                                                                    | 45    | 40.18%           | 65.38%                  |
| Total(valid)                                                                                                             | 104   |                  | 100.00%                 |
| No answer                                                                                                                | 8     | 7.14%            |                         |
| Not displayed                                                                                                            | 0     | 0.00%            |                         |
| Total(gross)                                                                                                             | 112   |                  | 100.00%                 |
| Descriptive statistics                                                                                                   |       |                  |                         |
| Arithmetic mean                                                                                                          |       | 3.91             |                         |
| Standard deviation                                                                                                       |       | 1.17             |                         |
| Summary for G4Q00002                                                                                                     |       |                  |                         |
| How do you rank the importance of spatial data in your work on the scale of [1 (not important), 5 (very important)]?     |       |                  |                         |

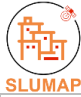

## Results of Online Survey: <https://slummap.net/>

| Answer                                                                                               | Count | Gross percentage | Top 2, Middle, Bottom 2 |
|------------------------------------------------------------------------------------------------------|-------|------------------|-------------------------|
| 1 (1)                                                                                                | 0     | 0.00%            | 5.83%                   |
| 2 (2)                                                                                                | 6     | 5.36%            |                         |
| 3 (3)                                                                                                | 17    | 15.18%           | 16.50%                  |
| 4 (4)                                                                                                | 13    | 11.61%           |                         |
| 5 (5)                                                                                                | 67    | 59.82%           | 77.67%                  |
| Total(valid)                                                                                         | 103   |                  | 100.00%                 |
| No answer                                                                                            | 9     | 8.04%            |                         |
| Not displayed                                                                                        | 0     | 0.00%            |                         |
| Total(gross)                                                                                         | 112   |                  | 100.00%                 |
| <b>Descriptive statistics</b>                                                                        |       |                  |                         |
| Arithmetic mean                                                                                      |       |                  | 4.37                    |
| Standard deviation                                                                                   |       |                  | 0.96                    |
| <b>Summary for G4Q00003</b>                                                                          |       |                  |                         |
| <b>How do you have access to slum map data?</b>                                                      |       |                  |                         |
| Answer                                                                                               | Count | Gross percentage |                         |
| Paper maps (SQ01)                                                                                    | 36    | 32.14%           |                         |
| GIS files (SQ02)                                                                                     | 57    | 50.89%           |                         |
| GIS database (SQ03)                                                                                  | 46    | 41.07%           |                         |
| Web service (SQ04)                                                                                   | 35    | 31.25%           |                         |
| No/very limited access (SQ06)                                                                        | 30    | 26.79%           |                         |
| Other                                                                                                | 8     | 7.14%            |                         |
| Total(gross)                                                                                         | 212   |                  | 100.00%                 |
| <b>Summary for G4Q00004</b>                                                                          |       |                  |                         |
| <b>Which one of the following best describes the source of your data?</b>                            |       |                  |                         |
| Answer                                                                                               | Count | Gross percentage |                         |
| Self production (AO01)                                                                               | 39    | 34.82%           |                         |
| Government official data (AO02)                                                                      | 26    | 23.21%           |                         |
| Third party (AO03)                                                                                   | 15    | 13.39%           |                         |
| Open online portal (AO04)                                                                            | 18    | 16.07%           |                         |
| Unknown (AO05)                                                                                       | 0     | 0.00%            |                         |
| Other                                                                                                | 0     | 0.00%            |                         |
| No answer                                                                                            | 11    | 9.82%            |                         |
| Not displayed                                                                                        | 3     | 2.68%            |                         |
| Total(gross)                                                                                         | 112   |                  | 100.00%                 |
| <b>Summary for G4Q00005</b>                                                                          |       |                  |                         |
| <b>According to your knowledge, how is your slum data produced?</b>                                  |       |                  |                         |
| Answer                                                                                               | Count | Gross percentage |                         |
| Field work with pen and paper (SQ01)                                                                 | 47    | 41.96%           |                         |
| Field work with GPS technology (SQ02)                                                                | 63    | 56.25%           |                         |
| Participatory mapping (SQ03)                                                                         | 57    | 50.89%           |                         |
| Satellite image interpretation by human (SQ04)                                                       | 63    | 56.25%           |                         |
| Drone image interpretation by human (SQ05)                                                           | 18    | 16.07%           |                         |
| Satellite image interpretation with AI (SQ06)                                                        | 16    | 14.29%           |                         |
| Drone image interpretation with AI (SQ07)                                                            | 4     | 3.57%            |                         |
| Unknown (SQ08)                                                                                       | 1     | 0.89%            |                         |
| Other                                                                                                | 3     | 2.68%            |                         |
| Not displayed                                                                                        | 11    | 9.82%            |                         |
| Total(gross)                                                                                         | 283   |                  | 100.00%                 |
| <b>Summary for G4Q00006(SQ01)[Free open airborne images]</b>                                         |       |                  |                         |
| <b>Please indicate the proportion of the following data types involved in your work or research.</b> |       |                  |                         |
| Answer                                                                                               | Count | Gross percentage |                         |
| 80-100% (AO01)                                                                                       | 21    | 18.75%           |                         |
| 60-80% (AO02)                                                                                        | 13    | 11.61%           |                         |
| 40-60% (AO03)                                                                                        | 12    | 10.71%           |                         |
| 20-40% (AO04)                                                                                        | 8     | 7.14%            |                         |
| 0-20% (AO05)                                                                                         | 20    | 17.86%           |                         |
| No answer                                                                                            | 38    | 33.93%           |                         |
| Not displayed                                                                                        | 0     | 0.00%            |                         |
| Total(gross)                                                                                         | 112   |                  | 100.00%                 |
| <b>Summary for G4Q00006(SQ02)[Paid airborne images]</b>                                              |       |                  |                         |
| <b>Please indicate the proportion of the following data types involved in your work or research.</b> |       |                  |                         |
| Answer                                                                                               | Count | Gross percentage |                         |
| 80-100% (AO01)                                                                                       | 7     | 6.25%            |                         |
| 60-80% (AO02)                                                                                        | 0     | 0.00%            |                         |
| 40-60% (AO03)                                                                                        | 5     | 4.46%            |                         |
| 20-40% (AO04)                                                                                        | 12    | 10.71%           |                         |
| 0-20% (AO05)                                                                                         | 33    | 29.46%           |                         |
| No answer                                                                                            | 55    | 49.11%           |                         |
| Not displayed                                                                                        | 0     | 0.00%            |                         |
| Total(gross)                                                                                         | 112   |                  | 100.00%                 |
| <b>Summary for G4Q00006(SQ03)[LiDAR or radar point cloud data]</b>                                   |       |                  |                         |



## Results of Online Survey: <https://slummap.net/>

| Please indicate the proportion of the following data types involved in your work or research.                |       |                  |  |         |
|--------------------------------------------------------------------------------------------------------------|-------|------------------|--|---------|
| Answer                                                                                                       | Count | Gross percentage |  |         |
| 80-100% (AO01)                                                                                               | 1     | 0.89%            |  |         |
| 60-80% (AO02)                                                                                                | 2     | 1.79%            |  |         |
| 40-60% (AO03)                                                                                                | 4     | 3.57%            |  |         |
| 20-40% (AO04)                                                                                                | 5     | 4.46%            |  |         |
| 0-20% (AO05)                                                                                                 | 29    | 25.89%           |  |         |
| No answer                                                                                                    | 71    | 63.39%           |  |         |
| Not displayed                                                                                                | 0     | 0.00%            |  |         |
| Total(gross)                                                                                                 | 112   |                  |  | 100.00% |
| Summary for G4Q0006(SQ04)[Image derived GIS polygons, points and lines]                                      |       |                  |  |         |
| Please indicate the proportion of the following data types involved in your work or research.                |       |                  |  |         |
| Answer                                                                                                       | Count | Gross percentage |  |         |
| 80-100% (AO01)                                                                                               | 26    | 23.21%           |  |         |
| 60-80% (AO02)                                                                                                | 13    | 11.61%           |  |         |
| 40-60% (AO03)                                                                                                | 15    | 13.39%           |  |         |
| 20-40% (AO04)                                                                                                | 13    | 11.61%           |  |         |
| 0-20% (AO05)                                                                                                 | 11    | 9.82%            |  |         |
| No answer                                                                                                    | 34    | 30.36%           |  |         |
| Not displayed                                                                                                | 0     | 0.00%            |  |         |
| Total(gross)                                                                                                 | 112   |                  |  | 100.00% |
| Summary for G4Q0006(SQ05)[Government official field survey data]                                             |       |                  |  |         |
| Please indicate the proportion of the following data types involved in your work or research.                |       |                  |  |         |
| Answer                                                                                                       | Count | Gross percentage |  |         |
| 80-100% (AO01)                                                                                               | 23    | 20.54%           |  |         |
| 60-80% (AO02)                                                                                                | 18    | 16.07%           |  |         |
| 40-60% (AO03)                                                                                                | 17    | 15.18%           |  |         |
| 20-40% (AO04)                                                                                                | 12    | 10.71%           |  |         |
| 0-20% (AO05)                                                                                                 | 20    | 17.86%           |  |         |
| No answer                                                                                                    | 22    | 19.64%           |  |         |
| Not displayed                                                                                                | 0     | 0.00%            |  |         |
| Total(gross)                                                                                                 | 112   |                  |  | 100.00% |
| Summary for G4Q0006(SQ06)[Crowdsourcing data from citizen participants]                                      |       |                  |  |         |
| Please indicate the proportion of the following data types involved in your work or research.                |       |                  |  |         |
| Answer                                                                                                       | Count | Gross percentage |  |         |
| 80-100% (AO01)                                                                                               | 7     | 6.25%            |  |         |
| 60-80% (AO02)                                                                                                | 11    | 9.82%            |  |         |
| 40-60% (AO03)                                                                                                | 12    | 10.71%           |  |         |
| 20-40% (AO04)                                                                                                | 16    | 14.29%           |  |         |
| 0-20% (AO05)                                                                                                 | 20    | 17.86%           |  |         |
| No answer                                                                                                    | 46    | 41.07%           |  |         |
| Not displayed                                                                                                | 0     | 0.00%            |  |         |
| Total(gross)                                                                                                 | 112   |                  |  | 100.00% |
| Summary for G4Q0007(SQ01)[Paid software and tools]                                                           |       |                  |  |         |
| Please indicate a rough proportion of your working time using the following tools for spatial data analysis. |       |                  |  |         |
| Answer                                                                                                       | Count | Gross percentage |  |         |
| 80-100% (AO01)                                                                                               | 18    | 16.07%           |  |         |
| 60-80% (AO02)                                                                                                | 12    | 10.71%           |  |         |
| 40-60% (AO03)                                                                                                | 5     | 4.46%            |  |         |
| 20-40% (AO04)                                                                                                | 17    | 15.18%           |  |         |
| 0-20% (AO05)                                                                                                 | 24    | 21.43%           |  |         |
| No answer                                                                                                    | 36    | 32.14%           |  |         |
| Not displayed                                                                                                | 0     | 0.00%            |  |         |
| Total(gross)                                                                                                 | 112   |                  |  | 100.00% |
| Summary for G4Q0007(SQ02)[Open source software and tools]                                                    |       |                  |  |         |
| Please indicate a rough proportion of your working time using the following tools for spatial data analysis. |       |                  |  |         |
| Answer                                                                                                       | Count | Gross percentage |  |         |
| 80-100% (AO01)                                                                                               | 37    | 33.04%           |  |         |
| 60-80% (AO02)                                                                                                | 17    | 15.18%           |  |         |
| 40-60% (AO03)                                                                                                | 15    | 13.39%           |  |         |
| 20-40% (AO04)                                                                                                | 7     | 6.25%            |  |         |
| 0-20% (AO05)                                                                                                 | 14    | 12.50%           |  |         |
| No answer                                                                                                    | 22    | 19.64%           |  |         |
| Not displayed                                                                                                | 0     | 0.00%            |  |         |
| Total(gross)                                                                                                 | 112   |                  |  | 100.00% |
| Summary for G4Q0007(SQ03)[Open web service tools]                                                            |       |                  |  |         |
| Please indicate a rough proportion of your working time using the following tools for spatial data analysis. |       |                  |  |         |
| Answer                                                                                                       | Count | Gross percentage |  |         |
| 80-100% (AO01)                                                                                               | 14    | 12.50%           |  |         |
| 60-80% (AO02)                                                                                                | 10    | 8.93%            |  |         |
| 40-60% (AO03)                                                                                                | 11    | 9.82%            |  |         |
| 20-40% (AO04)                                                                                                | 11    | 9.82%            |  |         |
| 0-20% (AO05)                                                                                                 | 19    | 16.96%           |  |         |





## Results of Online Survey: <https://slummap.net/>

|                                                                                                              |       |                  |         |
|--------------------------------------------------------------------------------------------------------------|-------|------------------|---------|
| No answer                                                                                                    | 47    | 41.96%           |         |
| Not displayed                                                                                                | 0     | 0.00%            |         |
| Total(gross)                                                                                                 | 112   |                  | 100.00% |
| Please indicate a rough proportion of your working time using the following tools for spatial data analysis. |       |                  |         |
| Answer                                                                                                       | Count | Gross percentage |         |
| 80-100% (AO01)                                                                                               | 8     | 7.14%            |         |
| 60-80% (AO02)                                                                                                | 3     | 2.68%            |         |
| 40-60% (AO03)                                                                                                | 8     | 7.14%            |         |
| 20-40% (AO04)                                                                                                | 7     | 6.25%            |         |
| 0-20% (AO05)                                                                                                 | 30    | 26.79%           |         |
| No answer                                                                                                    | 56    | 50.00%           |         |
| Not displayed                                                                                                | 0     | 0.00%            |         |
| Total(gross)                                                                                                 | 112   |                  | 100.00% |
| <b>Summary for G4Q00008</b>                                                                                  |       |                  |         |
| Please specify the minimum frequency slum maps need to be updated.                                           |       |                  |         |
| Answer                                                                                                       | Count | Gross percentage |         |
| < 1 month (AO01)                                                                                             | 4     | 3.57%            |         |
| 1 - 3 months (AO02)                                                                                          | 13    | 11.61%           |         |
| 3 - 6 months (AO03)                                                                                          | 11    | 9.82%            |         |
| 6 - 12 months (AO04)                                                                                         | 27    | 24.11%           |         |
| 12 - 24 months (AO05)                                                                                        | 27    | 24.11%           |         |
| > 24 months (AO06)                                                                                           | 11    | 9.82%            |         |
| No answer                                                                                                    | 19    | 16.96%           |         |
| Not displayed                                                                                                | 0     | 0.00%            |         |
| Total(gross)                                                                                                 | 112   |                  | 100.00% |
| <b>Summary for G4Q00009</b>                                                                                  |       |                  |         |
| Which of the following level of service would be most beneficial to your work or research?                   |       |                  |         |
| Answer                                                                                                       | Count | Gross percentage |         |
| Raw image data download (AO01)                                                                               | 14    | 12.50%           |         |
| GIS data download (AO02)                                                                                     | 44    | 39.29%           |         |
| Web based analysis service (slum location, size, population estimation) ) (AO03)                             | 41    | 36.61%           |         |
| Other                                                                                                        | 0     | 0.00%            |         |
| No answer                                                                                                    | 13    | 11.61%           |         |
| Not displayed                                                                                                | 0     | 0.00%            |         |
| Total(gross)                                                                                                 | 112   |                  | 100.00% |
| <b>Summary for G4Q00010</b>                                                                                  |       |                  |         |
| What data and tools that are non-spatial are you mostly using in link with your work on slums?               |       |                  |         |
| Answer                                                                                                       | Count | Gross percentage |         |
| Answer                                                                                                       | 3     | 2.68%            |         |
| No answer                                                                                                    | 109   | 97.32%           |         |
| Not displayed                                                                                                | 0     | 0.00%            |         |
| Total(gross)                                                                                                 | 112   |                  | 100.00% |
| <b>Summary for G1Q00001</b>                                                                                  |       |                  |         |
| Please indicate your gender.                                                                                 |       |                  |         |
| Answer                                                                                                       | Count | Gross percentage |         |
| Female (AO01)                                                                                                | 34    | 30.36%           |         |
| Male (AO02)                                                                                                  | 71    | 63.39%           |         |
| Others (AO03)                                                                                                | 0     | 0.00%            |         |
| No answer                                                                                                    | 7     | 6.25%            |         |
| Not displayed                                                                                                | 0     | 0.00%            |         |
| Total(gross)                                                                                                 | 112   |                  | 100.00% |
| <b>Summary for G1Q00002</b>                                                                                  |       |                  |         |
| Please indicate your age below.                                                                              |       |                  |         |
| Answer                                                                                                       | Count | Gross percentage |         |
| < 25 (AO01)                                                                                                  | 1     | 0.89%            |         |
| 25 - 35 (AO02)                                                                                               | 42    | 37.50%           |         |
| 36 - 45 (AO03)                                                                                               | 42    | 37.50%           |         |
| 46 - 55 (AO04)                                                                                               | 14    | 12.50%           |         |
| > 55 (AO05)                                                                                                  | 6     | 5.36%            |         |
| No answer                                                                                                    | 7     | 6.25%            |         |
| Not displayed                                                                                                | 0     | 0.00%            |         |
| Total(gross)                                                                                                 | 112   |                  | 100.00% |
| <b>Summary for G1Q00003</b>                                                                                  |       |                  |         |
| How many years of professional experience do you have?                                                       |       |                  |         |
| Answer                                                                                                       | Count | Gross percentage |         |
| 0-3 years (AO01)                                                                                             | 12    | 10.71%           |         |
| 4-6 years (AO02)                                                                                             | 11    | 9.82%            |         |
| 7-10 years (AO03)                                                                                            | 28    | 25.00%           |         |
| 10+ years (AO04)                                                                                             | 55    | 49.11%           |         |
| No answer                                                                                                    | 6     | 5.36%            |         |
| Not displayed                                                                                                | 0     | 0.00%            |         |





## Results of Online Survey: <https://slummap.net/>

|                                                                                                                               |       |                  |         |
|-------------------------------------------------------------------------------------------------------------------------------|-------|------------------|---------|
| Total(gross)                                                                                                                  | 112   |                  | 100.00% |
| <b>Summary for G1Q00004</b>                                                                                                   |       |                  |         |
| <b>Which of the following best describes the sectors you work for?</b>                                                        |       |                  |         |
| Answer                                                                                                                        | Count | Gross percentage |         |
| National government (AO01)                                                                                                    | 8     | 7.14%            |         |
| Sub national/local government (AO02)                                                                                          | 5     | 4.46%            |         |
| Civil society/NGO (AO03)                                                                                                      | 6     | 5.36%            |         |
| Private sector (AO04)                                                                                                         | 3     | 2.68%            |         |
| Academia/Universities (AO05)                                                                                                  | 60    | 53.57%           |         |
| Research institution (non-university) (AO06)                                                                                  | 16    | 14.29%           |         |
| International organization (AO07)                                                                                             | 7     | 6.25%            |         |
| Other                                                                                                                         | 0     | 0.00%            |         |
| No answer                                                                                                                     | 4     | 3.57%            |         |
| Not displayed                                                                                                                 | 3     | 2.68%            |         |
| Total(gross)                                                                                                                  | 112   |                  | 100.00% |
| <b>Summary for G1Q00005</b>                                                                                                   |       |                  |         |
| <b>Which of the following best describes your professional knowledge?</b>                                                     |       |                  |         |
| Answer                                                                                                                        | Count | Gross percentage |         |
| City/regional planning (SQ01)                                                                                                 | 49    | 43.75%           |         |
| Landscape architecture (SQ02)                                                                                                 | 1     | 0.89%            |         |
| Remote sensing and photogrammetry (SQ03)                                                                                      | 29    | 25.89%           |         |
| Human geography (SQ04)                                                                                                        | 30    | 26.79%           |         |
| Geoinformatics (SQ05)                                                                                                         | 38    | 33.93%           |         |
| Environmental science (SQ06)                                                                                                  | 16    | 14.29%           |         |
| Economy (SQ07)                                                                                                                | 10    | 8.93%            |         |
| Data science and artificial intelligence (SQ08)                                                                               | 17    | 15.18%           |         |
| Other                                                                                                                         | 27    | 24.11%           |         |
| Total(gross)                                                                                                                  | 217   |                  | 100.00% |
| <b>Summary for G1Q00006 [1]</b>                                                                                               |       |                  |         |
| <b>In your project or during your work, please rank the involvement (from high to low) in the following tasks.[Ranking 1]</b> |       |                  |         |
| Answer                                                                                                                        | Count | Gross percentage |         |
| Data collection through fieldwork (AO01)                                                                                      | 43    | 38.39%           |         |
| Data collection through compiling multisource data (AO02)                                                                     | 11    | 9.82%            |         |
| Database construction (AO03)                                                                                                  | 1     | 0.89%            |         |
| Data preprocessing and cleaning (AO04)                                                                                        | 4     | 3.57%            |         |
| Data analysis tool/program development (AO05)                                                                                 | 6     | 5.36%            |         |
| Data analysis (visualization, modeling and simulation) (AO06)                                                                 | 12    | 10.71%           |         |
| Data dissemination (through web service) (AO07)                                                                               | 0     | 0.00%            |         |
| Consulting (AO08)                                                                                                             | 9     | 8.04%            |         |
| Policy making (AO09)                                                                                                          | 4     | 3.57%            |         |
| Planning (AO10)                                                                                                               | 13    | 11.61%           |         |
| Other administrative (AO11)                                                                                                   | 0     | 0.00%            |         |
| Not displayed                                                                                                                 | 9     | 8.04%            |         |
| Total(gross)                                                                                                                  | 112   |                  | 100.00% |
| <b>Summary for G1Q00006 [2]</b>                                                                                               |       |                  |         |
| <b>In your project or during your work, please rank the involvement (from high to low) in the following tasks.[Ranking 2]</b> |       |                  |         |
| Answer                                                                                                                        | Count | Gross percentage |         |
| Data collection through fieldwork (AO01)                                                                                      | 10    | 8.93%            |         |
| Data collection through compiling multisource data (AO02)                                                                     | 23    | 20.54%           |         |
| Database construction (AO03)                                                                                                  | 11    | 9.82%            |         |
| Data preprocessing and cleaning (AO04)                                                                                        | 10    | 8.93%            |         |
| Data analysis tool/program development (AO05)                                                                                 | 12    | 10.71%           |         |
| Data analysis (visualization, modeling and simulation) (AO06)                                                                 | 11    | 9.82%            |         |
| Data dissemination (through web service) (AO07)                                                                               | 2     | 1.79%            |         |
| Consulting (AO08)                                                                                                             | 3     | 2.68%            |         |
| Policy making (AO09)                                                                                                          | 6     | 5.36%            |         |
| Planning (AO10)                                                                                                               | 10    | 8.93%            |         |
| Other administrative (AO11)                                                                                                   | 2     | 1.79%            |         |
| Not displayed                                                                                                                 | 12    | 10.71%           |         |
| Total(gross)                                                                                                                  | 112   |                  | 100.00% |
| <b>Summary for G1Q00006 [3]</b>                                                                                               |       |                  |         |
| <b>In your project or during your work, please rank the involvement (from high to low) in the following tasks.[Ranking 3]</b> |       |                  |         |
| Answer                                                                                                                        | Count | Gross percentage |         |
| Data collection through fieldwork (AO01)                                                                                      | 10    | 8.93%            |         |
| Data collection through compiling multisource data (AO02)                                                                     | 10    | 8.93%            |         |
| Database construction (AO03)                                                                                                  | 7     | 6.25%            |         |
| Data preprocessing and cleaning (AO04)                                                                                        | 13    | 11.61%           |         |
| Data analysis tool/program development (AO05)                                                                                 | 15    | 13.39%           |         |
| Data analysis (visualization, modeling and simulation) (AO06)                                                                 | 15    | 13.39%           |         |
| Data dissemination (through web service) (AO07)                                                                               | 1     | 0.89%            |         |
| Consulting (AO08)                                                                                                             | 8     | 7.14%            |         |
| Policy making (AO09)                                                                                                          | 3     | 2.68%            |         |
| Planning (AO10)                                                                                                               | 7     | 6.25%            |         |



## Results of Online Survey: <https://slummap.net/>

|                                                                                                                               |       |                  |                         |
|-------------------------------------------------------------------------------------------------------------------------------|-------|------------------|-------------------------|
| Other administrative (AO11)                                                                                                   | 3     | 2.68%            |                         |
| Not displayed                                                                                                                 | 20    | 17.86%           |                         |
| Total(gross)                                                                                                                  | 112   |                  | 100.00%                 |
| <b>Summary for G1Q00006 [4]</b>                                                                                               |       |                  |                         |
| <b>In your project or during your work, please rank the involvement (from high to low) in the following tasks.[Ranking 4]</b> |       |                  |                         |
| Answer                                                                                                                        | Count | Gross percentage |                         |
| Data collection through fieldwork (AO01)                                                                                      | 5     | 4.46%            |                         |
| Data collection through compiling multisource data (AO02)                                                                     | 9     | 8.04%            |                         |
| Database construction (AO03)                                                                                                  | 4     | 3.57%            |                         |
| Data preprocessing and cleaning (AO04)                                                                                        | 12    | 10.71%           |                         |
| Data analysis tool/program development (AO05)                                                                                 | 8     | 7.14%            |                         |
| Data analysis (visualization, modeling and simulation) (AO06)                                                                 | 15    | 13.39%           |                         |
| Data dissemination (through web service) (AO07)                                                                               | 6     | 5.36%            |                         |
| Consulting (AO08)                                                                                                             | 5     | 4.46%            |                         |
| Policy making (AO09)                                                                                                          | 4     | 3.57%            |                         |
| Planning (AO10)                                                                                                               | 12    | 10.71%           |                         |
| Other administrative (AO11)                                                                                                   | 3     | 2.68%            |                         |
| Not displayed                                                                                                                 | 29    | 25.89%           |                         |
| Total(gross)                                                                                                                  | 112   |                  | 100.00%                 |
| <b>Summary for G1Q00006 [5]</b>                                                                                               |       |                  |                         |
| <b>In your project or during your work, please rank the involvement (from high to low) in the following tasks.[Ranking 5]</b> |       |                  |                         |
| Answer                                                                                                                        | Count | Gross percentage |                         |
| Data collection through fieldwork (AO01)                                                                                      | 4     | 3.57%            |                         |
| Data collection through compiling multisource data (AO02)                                                                     | 3     | 2.68%            |                         |
| Database construction (AO03)                                                                                                  | 6     | 5.36%            |                         |
| Data preprocessing and cleaning (AO04)                                                                                        | 6     | 5.36%            |                         |
| Data analysis tool/program development (AO05)                                                                                 | 2     | 1.79%            |                         |
| Data analysis (visualization, modeling and simulation) (AO06)                                                                 | 12    | 10.71%           |                         |
| Data dissemination (through web service) (AO07)                                                                               | 5     | 4.46%            |                         |
| Consulting (AO08)                                                                                                             | 9     | 8.04%            |                         |
| Policy making (AO09)                                                                                                          | 7     | 6.25%            |                         |
| Planning (AO10)                                                                                                               | 4     | 3.57%            |                         |
| Other administrative (AO11)                                                                                                   | 7     | 6.25%            |                         |
| Not displayed                                                                                                                 | 47    | 41.96%           |                         |
| Total(gross)                                                                                                                  | 112   |                  | 100.00%                 |
| <b>Summary for G3Q00001</b>                                                                                                   |       |                  |                         |
| <b>Which of the following items best describe your department.</b>                                                            |       |                  |                         |
| Answer                                                                                                                        | Count | Gross percentage |                         |
| Urban planning and management (SQ01)                                                                                          | 14    | 12.50%           |                         |
| Environmental protection and management (SQ02)                                                                                | 4     | 3.57%            |                         |
| Surveying and mapping (SQ03)                                                                                                  | 8     | 7.14%            |                         |
| Land use planning and management (SQ04)                                                                                       | 4     | 3.57%            |                         |
| Water resources management (SQ05)                                                                                             | 4     | 3.57%            |                         |
| Space and astronomy (SQ06)                                                                                                    | 0     | 0.00%            |                         |
| Other                                                                                                                         | 4     | 3.57%            |                         |
| Not displayed                                                                                                                 | 86    | 76.79%           |                         |
| Total(gross)                                                                                                                  | 124   |                  | 100.00%                 |
| <b>Summary for G3Q00002</b>                                                                                                   |       |                  |                         |
| <b>How do you rate the amount of public/citizen involvement in your work on the scale of [0, 5]?</b>                          |       |                  |                         |
| Answer                                                                                                                        | Count | Gross percentage | Top 2, Middle, Bottom 2 |
| 1 (1)                                                                                                                         | 0     | 0.00%            | 16.00%                  |
| 2 (2)                                                                                                                         | 4     | 3.57%            |                         |
| 3 (3)                                                                                                                         | 3     | 2.68%            | 12.00%                  |
| 4 (4)                                                                                                                         | 13    | 11.61%           |                         |
| 5 (5)                                                                                                                         | 5     | 4.46%            | 72.00%                  |
| Total(valid)                                                                                                                  | 25    |                  | 100.00%                 |
| No answer                                                                                                                     | 87    | 77.68%           |                         |
| Not displayed                                                                                                                 | 0     | 0.00%            |                         |
| Total(gross)                                                                                                                  | 112   |                  | 100.00%                 |
| <b>Descriptive statistics</b>                                                                                                 |       |                  |                         |
| Arithmetic mean                                                                                                               |       | 3.76             |                         |
| Standard deviation                                                                                                            |       | 0.97             |                         |
| <b>Summary for G3Q00003</b>                                                                                                   |       |                  |                         |
| <b>Please select your frequently collaborated sectors from below.</b>                                                         |       |                  |                         |
| Answer                                                                                                                        | Count | Gross percentage |                         |
| National government (SQ01)                                                                                                    | 20    | 17.86%           |                         |
| Sub national/local government (SQ02)                                                                                          | 16    | 14.29%           |                         |
| Civil society/NGO (SQ03)                                                                                                      | 12    | 10.71%           |                         |
| Private sector (SQ04)                                                                                                         | 11    | 9.82%            |                         |
| Academia/Universities (SQ05)                                                                                                  | 9     | 8.04%            |                         |
| Research institution (non-university) (SQ06)                                                                                  | 6     | 5.36%            |                         |
| International organization (SQ07)                                                                                             | 10    | 8.93%            |                         |
| Other                                                                                                                         | 1     | 0.89%            |                         |



## Results of Online Survey: <https://slummap.net/>

|                                                                                                                       |                                          |              |  |                         |
|-----------------------------------------------------------------------------------------------------------------------|------------------------------------------|--------------|--|-------------------------|
|                                                                                                                       | Not displayed                            | 86           |  | 76.79%                  |
|                                                                                                                       | Total(gross)                             | 171          |  | <b>100.00%</b>          |
| <b>Summary for G5Q00002 [1]</b>                                                                                       |                                          |              |  |                         |
| <b>Please rank the importance of the following aspects in defining slums according to your knowledge.[Ranking 1]</b>  |                                          |              |  |                         |
| Answer                                                                                                                |                                          | <b>Count</b> |  | <b>Gross percentage</b> |
|                                                                                                                       | Socioeconomical (AO01)                   | 40           |  | 35.71%                  |
|                                                                                                                       | Physical or morphological (AO02)         | 25           |  | 22.32%                  |
|                                                                                                                       | Environmental and ecological (AO03)      | 10           |  | 8.93%                   |
|                                                                                                                       | Legal (AO04)                             | 26           |  | 23.21%                  |
|                                                                                                                       | Not displayed                            | 11           |  | 9.82%                   |
|                                                                                                                       | Total(gross)                             | <b>112</b>   |  | <b>100.00%</b>          |
| <b>Summary for G5Q00002 [2]</b>                                                                                       |                                          |              |  |                         |
| <b>Please rank the importance of the following aspects in defining slums according to your knowledge.[Ranking 2]</b>  |                                          |              |  |                         |
| Answer                                                                                                                |                                          | <b>Count</b> |  | <b>Gross percentage</b> |
|                                                                                                                       | Socioeconomical (AO01)                   | 35           |  | 31.25%                  |
|                                                                                                                       | Physical or morphological (AO02)         | 23           |  | 20.54%                  |
|                                                                                                                       | Environmental and ecological (AO03)      | 22           |  | 19.64%                  |
|                                                                                                                       | Legal (AO04)                             | 17           |  | 15.18%                  |
|                                                                                                                       | Not displayed                            | 15           |  | 13.39%                  |
|                                                                                                                       | Total(gross)                             | <b>112</b>   |  | <b>100.00%</b>          |
| <b>Summary for G5Q00002 [3]</b>                                                                                       |                                          |              |  |                         |
| <b>Please rank the importance of the following aspects in defining slums according to your knowledge.[Ranking 3]</b>  |                                          |              |  |                         |
| Answer                                                                                                                |                                          | <b>Count</b> |  | <b>Gross percentage</b> |
|                                                                                                                       | Socioeconomical (AO01)                   | 15           |  | 13.39%                  |
|                                                                                                                       | Physical or morphological (AO02)         | 25           |  | 22.32%                  |
|                                                                                                                       | Environmental and ecological (AO03)      | 35           |  | 31.25%                  |
|                                                                                                                       | Legal (AO04)                             | 17           |  | 15.18%                  |
|                                                                                                                       | Not displayed                            | 20           |  | 17.86%                  |
|                                                                                                                       | Total(gross)                             | <b>112</b>   |  | <b>100.00%</b>          |
| <b>Summary for G5Q00002 [4]</b>                                                                                       |                                          |              |  |                         |
| <b>Please rank the importance of the following aspects in defining slums according to your knowledge.[Ranking 4]</b>  |                                          |              |  |                         |
| Answer                                                                                                                |                                          | <b>Count</b> |  | <b>Gross percentage</b> |
|                                                                                                                       | Socioeconomical (AO01)                   | 6            |  | 5.36%                   |
|                                                                                                                       | Physical or morphological (AO02)         | 17           |  | 15.18%                  |
|                                                                                                                       | Environmental and ecological (AO03)      | 25           |  | 22.32%                  |
|                                                                                                                       | Legal (AO04)                             | 28           |  | 25.00%                  |
|                                                                                                                       | Not displayed                            | 36           |  | 32.14%                  |
|                                                                                                                       | Total(gross)                             | <b>112</b>   |  | <b>100.00%</b>          |
| <b>Summary for G5Q00003 [1]</b>                                                                                       |                                          |              |  |                         |
| <b>Please rank the scales of study that you would like to focus from the most (top) to least (bottom).[Ranking 1]</b> |                                          |              |  |                         |
| Answer                                                                                                                |                                          | <b>Count</b> |  | <b>Gross percentage</b> |
|                                                                                                                       | District and neighborhood (0-5km) (AO01) | 66           |  | 58.93%                  |
|                                                                                                                       | City (5-15km) (AO02)                     | 16           |  | 14.29%                  |
|                                                                                                                       | Regional (across cities) (AO03)          | 8            |  | 7.14%                   |
|                                                                                                                       | National (AO04)                          | 4            |  | 3.57%                   |
|                                                                                                                       | Continental (AO05)                       | 2            |  | 1.79%                   |
|                                                                                                                       | Global (AO06)                            | 6            |  | 5.36%                   |
|                                                                                                                       | Other administrative units (AO07)        | 1            |  | 0.89%                   |
|                                                                                                                       | Not displayed                            | 9            |  | 8.04%                   |
|                                                                                                                       | Total(gross)                             | <b>112</b>   |  | <b>100.00%</b>          |
| <b>Please rank the scales of study that you would like to focus from the most (top) to least (bottom).[Ranking 2]</b> |                                          |              |  |                         |
| Answer                                                                                                                |                                          | <b>Count</b> |  | <b>Gross percentage</b> |
|                                                                                                                       | District and neighborhood (0-5km) (AO01) | 9            |  | 8.04%                   |
|                                                                                                                       | City (5-15km) (AO02)                     | 52           |  | 46.43%                  |
|                                                                                                                       | Regional (across cities) (AO03)          | 18           |  | 16.07%                  |
|                                                                                                                       | National (AO04)                          | 11           |  | 9.82%                   |
|                                                                                                                       | Continental (AO05)                       | 4            |  | 3.57%                   |
|                                                                                                                       | Global (AO06)                            | 3            |  | 2.68%                   |
|                                                                                                                       | Other administrative units (AO07)        | 2            |  | 1.79%                   |
|                                                                                                                       | Not displayed                            | 13           |  | 11.61%                  |
|                                                                                                                       | Total(gross)                             | <b>112</b>   |  | <b>100.00%</b>          |
| <b>Summary for G5Q00003 [3]</b>                                                                                       |                                          |              |  |                         |
| <b>Please rank the scales of study that you would like to focus from the most (top) to least (bottom).[Ranking 3]</b> |                                          |              |  |                         |
| Answer                                                                                                                |                                          | <b>Count</b> |  | <b>Gross percentage</b> |
|                                                                                                                       | District and neighborhood (0-5km) (AO01) | 6            |  | 5.36%                   |
|                                                                                                                       | City (5-15km) (AO02)                     | 9            |  | 8.04%                   |
|                                                                                                                       | Regional (across cities) (AO03)          | 34           |  | 30.36%                  |
|                                                                                                                       | National (AO04)                          | 17           |  | 15.18%                  |
|                                                                                                                       | Continental (AO05)                       | 3            |  | 2.68%                   |
|                                                                                                                       | Global (AO06)                            | 8            |  | 7.14%                   |
|                                                                                                                       | Other administrative units (AO07)        | 3            |  | 2.68%                   |



## Results of Online Survey: <https://slummap.net/>

|                                                                                                                 |       |                  |         |
|-----------------------------------------------------------------------------------------------------------------|-------|------------------|---------|
| Not displayed                                                                                                   | 32    | 28.57%           |         |
| Total(gross)                                                                                                    | 112   |                  | 100.00% |
| <b>Summary for G5Q00003 [4]</b>                                                                                 |       |                  |         |
| Please rank the scales of study that you would like to focus from the most (top) to least (bottom).[Ranking 4]  |       |                  |         |
| Answer                                                                                                          | Count | Gross percentage |         |
| District and neighborhood (0-5km) (AO01)                                                                        | 0     | 0.00%            |         |
| City (5-15km) (AO02)                                                                                            | 0     | 0.00%            |         |
| Regional (across cities) (AO03)                                                                                 | 0     | 0.00%            |         |
| National (AO04)                                                                                                 | 0     | 0.00%            |         |
| Continental (AO05)                                                                                              | 0     | 0.00%            |         |
| Global (AO06)                                                                                                   | 0     | 0.00%            |         |
| Other administrative units (AO07)                                                                               | 0     | 0.00%            |         |
| Not displayed                                                                                                   | 112   | 100.00%          |         |
| Total(gross)                                                                                                    | 112   | 100.00%          |         |
| <b>Summary for G5Q00003 [5]</b>                                                                                 |       |                  |         |
| Please rank the scales of study that you would like to focus from the most (top) to least (bottom).[Ranking 5]  |       |                  |         |
| Answer                                                                                                          | Count | Gross percentage |         |
| District and neighborhood (0-5km) (AO01)                                                                        | 0     | 0.00%            |         |
| City (5-15km) (AO02)                                                                                            | 0     | 0.00%            |         |
| Regional (across cities) (AO03)                                                                                 | 0     | 0.00%            |         |
| National (AO04)                                                                                                 | 0     | 0.00%            |         |
| Continental (AO05)                                                                                              | 0     | 0.00%            |         |
| Global (AO06)                                                                                                   | 0     | 0.00%            |         |
| Other administrative units (AO07)                                                                               | 0     | 0.00%            |         |
| Not displayed                                                                                                   | 112   | 100.00%          |         |
| Total(gross)                                                                                                    | 112   | 100.00%          |         |
| <b>Summary for G5Q00003 [6]</b>                                                                                 |       |                  |         |
| Please rank the scales of study that you would like to focus from the most (top) to least (bottom).[Ranking 6]  |       |                  |         |
| Answer                                                                                                          | Count | Gross percentage |         |
| District and neighborhood (0-5km) (AO01)                                                                        | 0     | 0.00%            |         |
| City (5-15km) (AO02)                                                                                            | 0     | 0.00%            |         |
| Regional (across cities) (AO03)                                                                                 | 0     | 0.00%            |         |
| National (AO04)                                                                                                 | 0     | 0.00%            |         |
| Continental (AO05)                                                                                              | 0     | 0.00%            |         |
| Global (AO06)                                                                                                   | 0     | 0.00%            |         |
| Other administrative units (AO07)                                                                               | 0     | 0.00%            |         |
| Not displayed                                                                                                   | 112   | 100.00%          |         |
| Total(gross)                                                                                                    | 112   | 100.00%          |         |
| <b>Summary for G5Q00003 [7]</b>                                                                                 |       |                  |         |
| Please rank the scales of study that you would like to focus from the most (top) to least (bottom).[Ranking 7]  |       |                  |         |
| Answer                                                                                                          | Count | Gross percentage |         |
| District and neighborhood (0-5km) (AO01)                                                                        | 0     | 0.00%            |         |
| City (5-15km) (AO02)                                                                                            | 0     | 0.00%            |         |
| Regional (across cities) (AO03)                                                                                 | 0     | 0.00%            |         |
| National (AO04)                                                                                                 | 0     | 0.00%            |         |
| Continental (AO05)                                                                                              | 0     | 0.00%            |         |
| Global (AO06)                                                                                                   | 0     | 0.00%            |         |
| Other administrative units (AO07)                                                                               | 0     | 0.00%            |         |
| Not displayed                                                                                                   | 112   | 100.00%          |         |
| Total(gross)                                                                                                    | 112   | 100.00%          |         |
| <b>Summary for G5Q00004</b>                                                                                     |       |                  |         |
| Which of the following is most related to your work or research about slums?                                    |       |                  |         |
| Answer                                                                                                          | Count | Gross percentage |         |
| Building footprint mapping and area estimation (SQ01)                                                           | 52    | 46.43%           |         |
| 3D reconstruction (SQ02)                                                                                        | 8     | 7.14%            |         |
| Slum mapping and area estimation (without building footprint) (SQ03)                                            | 56    | 50.00%           |         |
| Population estimation (SQ04)                                                                                    | 60    | 53.57%           |         |
| Slum modeling (development and mobility) (SQ05)                                                                 | 32    | 28.57%           |         |
| Population projection (SQ06)                                                                                    | 26    | 23.21%           |         |
| Vulnerability and risk assessment (SQ07)                                                                        | 68    | 60.71%           |         |
| Other                                                                                                           | 10    | 8.93%            |         |
| Total(gross)                                                                                                    | 312   | 100.00%          |         |
| <b>Summary for G5Q00005</b>                                                                                     |       |                  |         |
| In your study area, do you think there is a large variation in either slum size or slum building size, or both? |       |                  |         |
| Answer                                                                                                          | Count | Gross percentage |         |
| Large variation in building size and type. (AO01)                                                               | 12    | 10.71%           |         |
| Large variation in slum size and type. (AO02)                                                                   | 30    | 26.79%           |         |
| Large variation in both building and slum size and type. (AO03)                                                 | 41    | 36.61%           |         |
| None of the above. (AO04)                                                                                       | 9     | 8.04%            |         |
| No answer                                                                                                       | 20    | 17.86%           |         |
| Not displayed                                                                                                   | 0     | 0.00%            |         |
| Total(gross)                                                                                                    | 112   | 100.00%          |         |



## Results of Online Survey: <https://slummap.net/>

| Summary for G5Q00006 [m <sup>2</sup> ]                                                                                      |       |                  |  |         |
|-----------------------------------------------------------------------------------------------------------------------------|-------|------------------|--|---------|
| Could you please estimate the average slum size in your study area? Please also specify the city name if available.         |       |                  |  |         |
| Answer                                                                                                                      | Count | Gross percentage |  |         |
| Answer                                                                                                                      | 19    | 16.96%           |  |         |
| No answer                                                                                                                   | 93    | 83.04%           |  |         |
| Not displayed                                                                                                               | 0     | 0.00%            |  |         |
| Total(gross)                                                                                                                | 112   |                  |  | 100.00% |
| Summary for G5Q00007                                                                                                        |       |                  |  |         |
| Please estimate the slum population (%) in your study area. Please also specify the city name in the comments if available. |       |                  |  |         |
| Answer                                                                                                                      | Count | Gross percentage |  |         |
| 0 - 5% (AO01)                                                                                                               | 3     | 2.68%            |  |         |
| 5 - 10% (AO02)                                                                                                              | 1     | 0.89%            |  |         |
| 10 - 20% (AO03)                                                                                                             | 10    | 8.93%            |  |         |
| 20 - 30% (AO04)                                                                                                             | 13    | 11.61%           |  |         |
| 30 - 50% (AO05)                                                                                                             | 5     | 4.46%            |  |         |
| 50 - 70% (AO06)                                                                                                             | 9     | 8.04%            |  |         |
| >70% (AO07)                                                                                                                 | 4     | 3.57%            |  |         |
| Comments                                                                                                                    | 20    | 17.86%           |  |         |
| No answer                                                                                                                   | 67    | 59.82%           |  |         |
| Not displayed                                                                                                               | 0     | 0.00%            |  |         |
| Total(gross)                                                                                                                | 132   |                  |  | 100.00% |
| Summary for G5Q00008                                                                                                        |       |                  |  |         |
| Could you please indicate which of the following best resembles the typical building type of slums in your study area?      |       |                  |  |         |
| Answer                                                                                                                      | Count | Gross percentage |  |         |
| Type 1 (SQ01)                                                                                                               | 33    | 29.46%           |  |         |
| Type 2 (SQ02)                                                                                                               | 52    | 46.43%           |  |         |
| Type 3 (SQ03)                                                                                                               | 21    | 18.75%           |  |         |
| Type 4 (SQ04)                                                                                                               | 49    | 43.75%           |  |         |
| Type 5 (SQ05)                                                                                                               | 19    | 16.96%           |  |         |
| Total(gross)                                                                                                                | 174   |                  |  | 100.00% |
| Summary for G5Q00009                                                                                                        |       |                  |  |         |
| What is the typical roofing materials of slums in your study areas?                                                         |       |                  |  |         |
| Answer                                                                                                                      | Count | Gross percentage |  |         |
| Plastic (SQ01)                                                                                                              | 25    | 22.32%           |  |         |
| Wood (SQ02)                                                                                                                 | 19    | 16.96%           |  |         |
| Iron/tin (SQ03)                                                                                                             | 84    | 75.00%           |  |         |
| Asbestos cement (SQ04)                                                                                                      | 23    | 20.54%           |  |         |
| Other                                                                                                                       | 13    | 11.61%           |  |         |
| Total(gross)                                                                                                                | 164   |                  |  | 100.00% |
| Summary for G2Q00001                                                                                                        |       |                  |  |         |
| Which of the following best describes your role?                                                                            |       |                  |  |         |
| Answer                                                                                                                      | Count | Gross percentage |  |         |
| Supervisor (SQ01)                                                                                                           | 21    | 18.75%           |  |         |
| Researcher (SQ02)                                                                                                           | 63    | 56.25%           |  |         |
| Lecturer (SQ03)                                                                                                             | 26    | 23.21%           |  |         |
| Technician (SQ04)                                                                                                           | 5     | 4.46%            |  |         |
| Student (SQ05)                                                                                                              | 14    | 12.50%           |  |         |
| Not displayed                                                                                                               | 36    | 32.14%           |  |         |
| Total(gross)                                                                                                                | 165   |                  |  | 100.00% |
| Summary for G2Q00002                                                                                                        |       |                  |  |         |
| In your project / research, how many people are working together as a team?                                                 |       |                  |  |         |
| Answer                                                                                                                      | Count | Gross percentage |  |         |
| 1-3 people (AO01)                                                                                                           | 20    | 17.86%           |  |         |
| 4-6 people (AO02)                                                                                                           | 27    | 24.11%           |  |         |
| 7-10 people (AO03)                                                                                                          | 7     | 6.25%            |  |         |
| 10+ people (AO04)                                                                                                           | 18    | 16.07%           |  |         |
| No answer                                                                                                                   | 40    | 35.71%           |  |         |
| Not displayed                                                                                                               | 0     | 0.00%            |  |         |
| Total(gross)                                                                                                                | 112   |                  |  | 100.00% |
| Summary for G2Q00003                                                                                                        |       |                  |  |         |
| Please select your frequently collaborated sectors from below.                                                              |       |                  |  |         |
| Answer                                                                                                                      | Count | Gross percentage |  |         |
| National government (SQ01)                                                                                                  | 25    | 22.32%           |  |         |
| Sub national/local government (SQ02)                                                                                        | 29    | 25.89%           |  |         |
| Civil society/NGO (SQ03)                                                                                                    | 31    | 27.68%           |  |         |
| Private sector (SQ04)                                                                                                       | 7     | 6.25%            |  |         |
| Academia/Universities (SQ05)                                                                                                | 64    | 57.14%           |  |         |
| Research institution (non-university) (SQ06)                                                                                | 33    | 29.46%           |  |         |
| International organization (SQ07)                                                                                           | 20    | 17.86%           |  |         |
| Other                                                                                                                       | 2     | 1.79%            |  |         |
| Not displayed                                                                                                               | 36    | 32.14%           |  |         |
| Total(gross)                                                                                                                | 247   |                  |  | 100.00% |

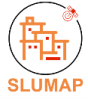

Results of Online Survey: <https://slummap.net/>
